1 **Title: Correlational selection and genetic architecture promote the leaf economics spectrum**  
2 **in a perennial grass**

3

4 **Authors:** Robert W. Heckman<sup>1,4</sup>, Jason E. Bonnette<sup>1</sup>, Brandon E. Campitelli<sup>1,2</sup>, Philip A. Fay<sup>3</sup>,  
5 Thomas E. Juenger<sup>1</sup>

6 <sup>1</sup> Department of Integrative Biology, University of Texas at Austin, Austin, TX, USA

7 <sup>2</sup> Texas Institute for Discovery Education in Science, University of Texas at Austin, Austin, TX,  
8 USA

9 <sup>3</sup> USDA-ARS Grassland, Soil, and Water Research Lab, Temple, TX, USA

10 <sup>4</sup> Correspondence: [robert.heckman@utexas.edu](mailto:robert.heckman@utexas.edu)

11

12 **Keywords**

13 functional ecology; leaf mass per area; local adaptation; quantitative genetics; quantitative trait

14 locus; QTL; switchgrass; trait-based ecology

## 15 **Abstract**

16           The leaf economics spectrum (LES) is hypothesized to result from a trade-off between  
17 resource acquisition and conservation. Yet few studies have examined the evolutionary  
18 mechanisms behind the LES, perhaps because most species exhibit relatively specialized leaf  
19 economics strategies. In a genetic mapping population of the phenotypically diverse grass  
20 *Panicum virgatum*, we evaluate two interacting mechanisms that may drive LES evolution: 1)  
21 genetic architecture, where multiple traits are coded by the same gene (pleiotropy) or by genes in  
22 close physical proximity (linkage), and 2) correlational selection, where selection acts non-  
23 additively on combinations of multiple traits. We found evidence suggesting that shared genetic  
24 architecture (pleiotropy) controls covariation between two pairs of leaf economics traits.  
25 Additionally, at five common gardens spanning 17 degrees of latitude, correlational selection  
26 favored particular combinations of leaf economics traits. Together, these results demonstrate  
27 how the LES can evolve within species.

28

## 29 **Introduction**

30           Globally, plants exhibit a correlated suite of functional traits known as the worldwide leaf  
31 economics spectrum (Wright et al. 2004, Shipley et al. 2006, Reich 2014). This spectrum is  
32 hypothesized to result from a trade-off between resource acquisition in high resource  
33 environments and resource conservation in low resource environments (Donovan et al. 2011).  
34 The acquisitive end of this spectrum is characterized by a quick-return on investment strategy of  
35 short-lived leaves with high nutrient content and metabolic requirements. The conservative end  
36 is characterized by a slow-return on investment strategy of long-lived leaves with low nutrient  
37 content and metabolic requirements. While evidence for the worldwide leaf economics spectrum

38 (LES) is highly consistent at the global scale (Wright et al. 2004, Díaz et al. 2016), results have  
39 been mixed at smaller spatial and taxonomic scales (e.g., Heberling and Fridley 2012, Edwards  
40 et al. 2014, Messier et al. 2017, Anderegg et al. 2018). These results have prompted several  
41 studies to examine how the LES originates, using either statistical (e.g., Shipley et al. 2006,  
42 Mason et al. 2016) or anatomical (e.g., Blonder et al. 2011, John et al. 2017, Onoda et al. 2017)  
43 perspectives. An important step toward resolving discrepancies among studies is to shift from  
44 describing the LES at different scales to examining the evolutionary forces that form the LES  
45 (Donovan et al. 2011). Two evolutionary mechanisms that can interact to promote or constraint  
46 LES evolution are correlational selection and genetic architecture.

47         Selection for favored trait combinations, or against maladaptive trait combinations (i.e.,  
48 correlational selection), is likely an important driver shaping functional trait correlations  
49 (Donovan et al. 2011). But the evolutionary responses to selection are also shaped by underlying  
50 genetic variation and covariance among traits (i.e., genetic architecture). Patterns of genetic  
51 covariance determine the possible trajectories of evolution and can constrain or facilitate the  
52 evolution of trait combinations (Walsh and Blows 2009). Thus, studying how adaptive  
53 syndromes like the LES evolve, requires accounting for both genetic architecture and  
54 correlational selection. Genetic architecture can arise from pleiotropy, where the same gene  
55 codes for multiple traits; from linkage, where genes coding for different traits are in close  
56 physical proximity and thus, are usually inherited together; or through linkage disequilibrium  
57 (LD), where alleles at different loci, and impacting different traits, are in statistical association  
58 (Lynch and Walsh 1998, Mackay 2001). Correlational selection occurs where selection acts on  
59 the covariance between two or more traits and those trait combinations reduce or enhance fitness  
60 (Lande and Arnold 1983). By favoring traits in combination, rather than isolation, correlational

61 selection can promote phenotypic integration (Svensson et al. 2021), potentially explaining the  
62 presence of correlated leaf economics strategies. Moreover, the two mechanisms, correlational  
63 selection and genetic architecture (pleiotropy, linkage, LD), can interact to promote or constraint  
64 LES evolution (Sinervo and Svensson 2002). When selection favors certain trait combinations,  
65 but disadvantageous combinations are genetically linked, evolution of the LES will be  
66 constrained (Donovan et al. 2011). Over time though, selection can break down linkage and LD  
67 between these disadvantageous combinations (Guilherme Pereira and Des Marais 2020).  
68 Correlational selection can also promote the evolution of genetic linkage between traits  
69 (Svensson et al. 2021), generating and maintaining the genetic foundation for the leaf economics  
70 spectrum. When selection and genetic architecture simultaneously favor the same trait  
71 combinations, LES evolution can proceed more rapidly (Donovan et al. 2011).

72         For the LES to evolve, leaf economics traits must exhibit genetic variation. But leaf  
73 economics traits and correlations between traits can also be driven by environmental factors, like  
74 fertilization and drought (Sherrard and Maherali 2006, Fajardo and Siefert 2018, Ji et al. 2020).  
75 Conventional approaches to studying the LES cannot separate these genetic and environmental  
76 components (Swenson et al. 2020, Ahrens et al. 2021). However, the potential for LES evolution  
77 can be assessed using quantitative genetics techniques (Donovan et al. 2011). Metrics like  
78 heritability and genetic correlations, which quantify the genetic component of individual traits  
79 and the shared genetic contribution to correlations between traits, can show whether leaf  
80 economics traits possess sufficient genetic variation to evolve. Going further, genetic constraints  
81 on the LES can be identified through genetic mapping and selection on the LES can be tested  
82 using a selection gradient analysis (Donovan et al. 2011). A well-established genetic mapping  
83 technique—quantitative trait locus (QTL) mapping—involves crossing individuals from opposite

84 ends of a phenotypic gradient, then testing for associations between the genome and phenotype  
85 (Mauricio 2001, Anderson and Mitchell-Olds 2011). Selection gradients can be estimated as the  
86 effect of a trait or trait combination on plant fitness and can be used to detect selection (Brodie  
87 et al. 1995, Conner and Hartl 2004, Caruso et al. 2020)

88         Recent efforts to quantify intraspecific variation in leaf economics traits has improved  
89 our understanding of the LES (Siefert et al. 2015, Messier et al. 2017, Anderegge et al. 2018).  
90 But, although intraspecific variation is required for evolution, these intraspecific studies rarely  
91 address how the LES evolves. To examine LES evolution, we leverage the strong ecotypic  
92 divergence in leaf economics strategies in *Panicum virgatum* L, a widespread C<sub>4</sub> grass  
93 (Aspinwall et al. 2013). First, we examined the genetics of three leaf economics traits—leaf mass  
94 per area (LMA), leaf nitrogen content (N<sub>MASS</sub>), and photosynthetic rate (A<sub>MASS</sub>)—in a genetic  
95 mapping population of *P. virgatum* in a single common garden in central Texas. Then, to test for  
96 correlational selection on leaf economics traits, we examined the fitness of clones of these plants  
97 at five sites spanning 17 degrees of latitude in the central United States. Together, this allowed us  
98 to answer four questions: 1) are leaf economics traits under detectable genetic control? 2) do leaf  
99 economics traits covary? 3) is covariation amongst traits genetically driven? 4) do particular  
100 combinations of leaf economics traits increase fitness in the field?

101

## 102 **Methods**

### 103 *Study system*

104         *Panicum virgatum* is an ecologically and economically important species possessing  
105 large phenotypic variation in leaf economics traits. *Panicum virgatum* is common throughout  
106 central North American grasslands, occupying habitats that vary considerably in season length

107 and mean annual temperature and precipitation (Lowry et al. 2014). To occupy these diverse  
108 habitats, *P. virgatum* has diverged into three ecotypes—upland, coastal, and lowland—with the  
109 coastal ecotype exhibiting characteristics intermediate between the other two (Casler 2012,  
110 Lovell et al. 2021). The upland ecotype typically occurs in northern regions with short growing  
111 seasons, and possesses an acquisitive strategy. The lowland ecotype, occurs in southern regions  
112 with long growing seasons, and possesses a conservative strategy (Aspinwall et al. 2013,  
113 Heckman et al. 2020).

#### 114 *Experimental setup*

115 This experimental design is described in detail by Milano et al. (2016) and (Lowry et al.  
116 2019). In summary, a genetic mapping population was developed by crossing the southern  
117 lowland genotype AP13 × the northern upland genotype DAC and the southern lowland  
118 genotype WBC × the northern upland genotype VS16. A single F<sub>1</sub> offspring from each of these  
119 two crosses was then crossed to produce a four-way outbred mapping population, which  
120 contained 400 full sibling F<sub>2</sub> offspring. By recombining upland and lowland alleles, this cross  
121 generated F<sub>2</sub> individuals that carry either two lowland alleles, two upland alleles, or one lowland  
122 and one upland allele at each locus. The F<sub>2</sub> offspring were then clonally propagated in 3.8L pots  
123 at Brackenridge Field Laboratory, Austin, TX.

124 In February 2014, individuals of each genotype were transplanted into a common garden  
125 at Brackenridge Field Lab, where the soil is Yazoo sandy loam (Milano et al. 2016). The field  
126 was first covered with weed cloth and each individual was planted into a hole in the weed cloth.  
127 Plants were randomly assigned to locations in the field in a honeycomb design, with each plant  
128 located 1.25 m from its four nearest neighbors. To prevent edge effects, the field was surrounded  
129 with a border row of plants of the lowland genotype AP13.

130 *Leaf economics measurements*

131           On 1-7 July 2014, we measured three leaf economics traits: mass-based photosynthetic  
132 capacity ( $A_{\text{MASS}}$ ), mass-based leaf nitrogen content ( $N_{\text{MASS}}$ ), and leaf mass per area (LMA). To  
133 calculate LMA, we measured the area of one penultimate fully expanded sun leaf per plant using  
134 a LI-3000C leaf area meter (LI-COR Biosciences, Lincoln, NE, USA), then dried leaves at 65°C  
135 to constant mass and weighed them. LMA is the ratio of leaf dry mass to leaf area. To calculate  
136  $N_{\text{MASS}}$ , these dried leaves were ground to a fine powder, then combusted in an elemental analyzer  
137 (Flash 2000 Organic Elemental NC Analyzer). To measure photosynthetic capacity, we enclosed  
138 two penultimate fully expanded sun leaves in the 2×3 cm cuvette of a LI-6400XT (LI-COR  
139 Biosciences, Lincoln, NE, USA) between 10:30 and 14:00. PAR was maintained within the  
140 cuvette at 1750  $\mu\text{mol m}^{-2} \text{s}^{-1}$  using an actinic light source; chamber  $\text{CO}_2$  supply was set to 400  
141 ppm, and leaf temperature and water vapor were allowed to track ambient conditions. We  
142 converted from an area- ( $A_{\text{AREA}}$ ) to mass-basis ( $A_{\text{MASS}}$ ) by dividing  $A_{\text{AREA}}$  by LMA.

143 *Fitness measurements*

144           Clonally propagated individuals of each  $F_2$  line were planted in spring 2015 at five  
145 locations throughout central North America (Kingsville, TX – Brookings, SD) that spanned 17  
146 degrees of latitude (details in Lowry et al 2019). Plantings at these five sites were identical in  
147 layout to the Austin, TX planting described above (see Lowry et al. 2019 for details). In 2017  
148 and 2018, plants were harvested each fall ~ 15 cm above ground level and aboveground biomass  
149 was dried and weighed. Biomasses measured in 2017 also appear in Lowry et al. (2019).  
150 Previous work has found that aboveground biomass is highly correlated with seed production in  
151 *P. virgatum* (Palik et al. 2016), making it a useful proxy for fitness (Lowry et al. 2019).

152 *Quantitative genetic and other statistical analyses*

153 To assess whether leaf traits in *P. virgatum* represent a leaf economics spectrum, we  
154 performed standardized major axis (SMA) regression on each pair of leaf traits using the ``sma``  
155 function in `smatr` (Warton et al. 2012). SMA regression is commonly used in functional ecology  
156 because, unlike least squares regression, it assumes that both variables are measured with error  
157 (Warton et al. 2006).

158 To quantify the degree of genetic control of leaf economics traits, we calculated broad-  
159 sense heritability ( $H^2$ ) of leaf economics traits using the ``mmer`` function in the `sommer` package  
160 (Covarrubias-Pazaran 2016). Heritability was the ratio of variance among lines (genetic variance,  
161  $V_G$ ) to total variance ( $V_G$  + environmental variance,  $V_E$ ) in each trait ( $V_G / (V_G + V_E)$ ), calculated  
162 from a model that accounted for the relatedness among individuals by incorporating an additive  
163 genetic relatedness matrix. Throughout, we refer to  $V_G$  and  $H^2$  rather than additive genetic  
164 variance ( $V_A$ ) and narrow-sense heritability ( $h^2$ ) because additive and dominance genetic  
165 variance are confounded in this full-sib cross (Hill 2013).

166 To estimate the proportion of variance shared among leaf traits due to genetic causes  
167 (genetic correlations,  $r_g$ ), we performed a multivariate analysis using ``mmer``. The model  
168 included all three leaf economics traits as responses with an additive genetic relatedness matrix  
169 as a random effect. To estimate the significance of these genetic correlations, we compared a  
170 model in which the genetic covariance between a pair of traits was estimated freely to a model in  
171 which the genetic covariance between those traits was constrained to 0 (i.e., no genetic  
172 covariance between traits was allowed) using a likelihood ratio test. A significant likelihood ratio  
173 test indicates that genetic covariance differs from 0.

174 *QTL mapping*



175 We conducted QTL mapping on leaf economics traits using the `qtl2` package (Broman et  
176 al. 2019). Methods for constructing the linkage map used in this analysis are described by Lovell  
177 et al. (2020). First, we assessed the likelihood that each genetic marker is associated with a  
178 phenotype of interest by using the `scan1` function with a leave-one-chromosome-out kinship  
179 matrix. This provided log-odds (LOD) profiles for every marker in the genome. From these LOD  
180 profiles, we identified putative QTL using the `find_peak` function with `drop = 1.5` and `peakdrop`  
181 `= 2.5` at a significance threshold of  $\alpha = 0.15$ . We determined the LOD score corresponding to  
182 this significance threshold via permutation test with 1000 iterations using the `scan1perm`  
183 function. We chose a relaxed significance threshold because a stricter threshold could hinder a  
184 primary goal of this study—to detect and evaluate QTL overlap among leaf traits. To maintain  
185 statistical rigor when evaluating putative QTL, we further assessed the significance and  
186 explanatory power of all QTL by fitting a multiple-QTL model for each phenotype using the  
187 `makeqtl` and `fitqtl` functions in the `qtl` package (Broman et al. 2003).

188 When QTL confidence intervals for two traits overlapped, we tested whether this overlap  
189 was due to pleiotropy (one QTL) or separate QTL using a pipeline from the `qtl2pleio` package  
190 (Boehm et al. 2019). To do this, we first used the `scan_pvl` function to identify the region of  
191 QTL overlap, then used the `find_pleio_peak_tib` function to identify the marker corresponding  
192 to the peak of the pleiotropy trace, then used the `boot_pvl` function with 1000 iterations to  
193 perform a bootstrapped multivariate QTL scan that evaluates the evidence for separate QTL. In  
194 this analysis, the null hypothesis is one QTL (i.e., pleiotropy). Thus,  $P > 0.05$  indicates a lack of  
195 evidence for separate QTL and is consistent with pleiotropy.

196 *Selection gradient analysis*

197 To assess linear and non-linear selection on leaf economics traits in the field, we  
198 performed a selection gradient analysis. Standard selection gradient analysis pairs a fitness  
199 component (or fitness proxy) with traits measured on the same individuals (Lande and Arnold  
200 1983). Here, however, we take a somewhat different approach: we measured leaf economics  
201 traits on plants at a single site, then pair these predictors with a fitness proxy measured on  
202 clonally propagated individuals at multiple sites. Because individuals grown at each site are  
203 genetic clones of the individuals measured for leaf economics traits, this is essentially a repeated-  
204 measures design. Importantly, we assume that plasticity and genotype-by-environment effects on  
205 LES traits are low. For selection gradients, we first mean-standardized genotype-level  
206 aboveground biomass separately for each of our five sites and two years by dividing each  
207 genotype's biomass by the site-level mean biomass that year (Franklin and Morrissey 2017).  
208 This results in a relativized proxy for fitness, such that average fitness at each site is equal to 1;  
209 above average fitness  $> 1$ ; and below average fitness  $< 1$ . Plants that died during the study were  
210 retained for analysis with biomass = 0. At each of the three northern sites (Brookings, KBS,  
211 Columbia), only 0-4 plants were recorded as dead in any year. This corresponds with a mortality  
212 rate of 0-1.3%. At the two southern sites, mortality was higher: 5.7% and 16.2% in Kingsville in  
213 2017 and 2018, respectively, and 0.3% and 8.2% in Austin in 2017 and 2018, respectively. We  
214 then examined how three mean-centered and variance-standardized (mean = 0, sd = 1) leaf  
215 economics traits impacted relative biomass in a single linear mixed model using the `lme`  
216 function in nlme (Pinheiro et al. 2016). This model included main effects (i.e., linear directional  
217 selection), quadratic effects (i.e., non-linear stabilizing or disruptive selection), and all two-way  
218 interactions between these three traits (i.e., non-linear correlational selection) and interactions  
219 between all leaf economics predictors and site identity. Year of biomass measurement did not

220 significantly interact with any other model parameters and was removed from the final model.  
221 To account for heteroscedasticity, this model included an identity variance structure (`varIdent`),  
222 which allows residual variance to differ by site.

223 To complement phenotypic selection gradients and circumvent the issue of measuring  
224 LES traits and biomass on different clonal propagates, we also performed genetic selection  
225 gradient analysis (Rausher 1992). To do this, we first calculated genomic best linear unbiased  
226 predictors (GBLUPs) for LES traits and biomass using the `mmer` model described above for  
227 estimating heritability. GBLUPs represent the additive genetic contribution to a given phenotype.  
228 We then performed selection gradient analysis with GBLUPs instead of phenotypic values using  
229 the `gls` function. This approach assesses only the genetic relationship between traits, which  
230 more accurately describes the evolutionary pressure on LES traits.

231

## 232 **Results**

233 *Are leaf economics traits under detectable genetic control?*

234 All three traits exhibited moderate broad-sense heritability ( $H^2$ ; Table 1). Of the three,  
235  $A_{MASS}$  had the lowest heritability ( $H^2 = 0.26$ ), while LMA and  $N_{MASS}$  had similar, and higher,  
236 heritability ( $H^2 = 0.51$  and  $0.46$ , respectively). For each trait, we detected 4-5 significant QTL  
237 (Table 2), which combined to explain 19-33% of variation in leaf economics traits (Table 1).  
238 Together, these results confirm that the leaf economics traits evaluated here have a substantial  
239 genetic basis.

240 *Do leaf economics traits covary phenotypically?*

241 In  $F_2$  individuals, there were significant bivariate relationships amongst all leaf  
242 economics traits. LMA covaried negatively with  $N_{MASS}$  ( $R^2 = 0.06$ ,  $P < 0.001$ ; Fig. 1a) and with

243  $A_{MASS}$  ( $R^2 = 0.29$ ,  $P < 0.001$ ; Fig. 1b), which is consistent with global LES relationships.  
244 Similarly,  $N_{MASS}$  and  $A_{MASS}$  covaried positively ( $R^2 = 0.06$ ,  $P < 0.001$ ; Fig. 1c). Thus, in this  
245 system, leaf economics traits significantly, although sometimes weakly, covary phenotypically.

246 *Is covariation amongst traits genetically driven?*

247 We detected 13 QTL for leaf economics traits, all of which were highly significant  
248 predictors of LES traits in multiple-QTL models ( $P < 0.05$ ; Table 2). These 13 QTL included  
249 three pairs of colocalized QTL (i.e., confidence intervals for the QTL overlapped; Fig. 2a):  
250 LMA- $A_{MASS}$  on Chr9K and  $A_{MASS}$ - $N_{MASS}$  at two locations on Chr2K. For all three pairs of  
251 colocalized QTL, our results are consistent with pleiotropy (i.e., one QTL for both traits) because  
252 we did not find evidence that these colocalized QTL were produced by distinct loci ( $P = 0.14$ ,  $P$   
253  $= 0.254$ , and  $P = 0.429$ , respectively; Fig. 2b). Further supporting pleiotropy, marker regression  
254 showed that genotype effects at colocalized QTL were in the same direction for both traits (i.e.,  
255 both conservative or both acquisitive). For instance, individuals possessing two upland alleles on  
256 Chr2K@12 had lower  $A_{MASS}$  and  $N_{MASS}$  than other genotypes. Similarly, at the QTL on Chr9K,  
257 individuals with two upland alleles had significantly higher  $A_{MASS}$  and significantly lower LMA  
258 than other genotypes. In total, these results show that leaf economics traits exhibit some degree  
259 of genetic coordination.

260 Despite seeing colocalized QTL for LMA- $A_{MASS}$  and  $N_{MASS}$ - $A_{MASS}$ , a significant genetic  
261 correlation existed only between LMA and  $A_{MASS}$  ( $r_g = -0.72$ ,  $\chi^2 = 15.87$ ,  $P < 0.001$ ; Table 3).  
262 Neither LMA- $N_{MASS}$  ( $r_g = -0.12$ ,  $\chi^2 = 0.79$ ,  $P = 0.37$ ) nor  $A_{MASS}$ - $N_{MASS}$  ( $r_g = 0.26$ ,  $\chi^2 = 1.11$ ,  $P =$   
263  $0.29$ ) had significant genetic correlations. These contrasting effects may be related to the  
264 directionality of QTL for the three LES traits. All five significant QTL for LMA were in the  
265 same direction and consistent with a conservative leaf economics strategy among the lowland

266 ecotype and an acquisitive strategy among the upland ecotype (i.e., individuals with both  
267 lowland alleles had high LMA and individuals with both upland alleles had low LMA; Figs. 2d,  
268 S2a-d). Conversely, three of the four  $N_{MASS}$  QTL and two of the four  $A_{MASS}$  QTL behaved  
269 opposite to LES predictions: individuals with both upland alleles had low  $N_{MASS}$  and low  $A_{MASS}$ ,  
270 while individuals with both lowland alleles had high  $N_{MASS}$  and high  $A_{MASS}$  (Figs 2b-c, S2g).  
271 When QTL differ in directionality, as LMA and  $N_{MASS}$  did, it may weaken the aggregate genetic  
272 correlations (Gromko 1995). Similarly, despite detecting two colocalized QTL for  $A_{MASS}$  and  
273  $N_{MASS}$ , these pairs of colocalized QTL were all in the opposite direction of typical leaf  
274 economics strategies, which could also weaken genetic correlations.

275 *Do particular combinations of leaf economics traits increase fitness in the field?*

276         There was a significant interactive effect of LMA and  $N_{MASS}$  on relative biomass across  
277 all sites ( $\gamma_{ij} = -0.05$ ;  $P = 0.015$ ; Table S2, S3; Fig. 3a). The relative biomass of individuals  
278 possessing conservative values of both traits (i.e., high LMA, low  $N_{MASS}$ ) was higher than that of  
279 individuals with acquisitive values of both traits (i.e., low LMA, high  $N_{MASS}$ ). Both conservative  
280 and acquisitive individuals had greater relative biomass than individuals with mismatched trait  
281 combinations (high LMA, high  $N_{MASS}$  or low LMA, low  $N_{MASS}$ ). This correlational selection for  
282 particular combinations of LMA and  $N_{MASS}$  could promote LES evolution. Additionally, when  
283 controlling for other trait values, LMA had a marginally significant direct positive effect on  
284 relative biomass across all sites (LMA:  $\beta = 0.03$ ;  $P = 0.081$ ; Table S2, S3).

285         Selection gradients differed among sites, but not systematically by latitude (Table S3, S4;  
286 Fig. 3b). Directional selection favored high LMA plants at four of five sites (Site  $\times$  LMA:  $P =$   
287 0.42; KBSM:  $\beta = 0.06$ ,  $P = 0.014$ ; CLMB:  $\beta = 0.04$ ,  $P = 0.095$ ; PKLE:  $\beta = 0.09$ ,  $P = 0.046$ ;  
288 KING:  $\beta = 0.12$ ,  $P = 0.063$ ; Table S3, S4), and high  $A_{MASS}$  plants at two of five sites (Site  $\times$

289  $A_{\text{MASS}}$ :  $P = 0.008$ ; KBSM:  $\beta = 0.06$ ,  $P = 0.015$ ; KING:  $\beta = 0.13$ ,  $P = 0.053$ ; Table S3, S4).  
290 Selection favoring higher values of both LMA and  $A_{\text{MASS}}$  combined with a negative genetic  
291 correlation between the two traits would generate a genetic constraint on the evolution of the  
292 LES in *P. virgatum*. Finally, correlational selection favored matched phenotypic combinations of  
293 LMA and  $N_{\text{MASS}}$  at two sites (Site  $\times$  LMA  $\times$   $N_{\text{MASS}}$ :  $P = 0.27$ ; BRKG:  $P = 0.059$ ; PKLE:  $P =$   
294  $0.045$ ; Table S4; Fig. S2) and matched combinations of  $A_{\text{MASS}}$  and  $N_{\text{MASS}}$  at two other sites (Site  
295  $\times$   $N_{\text{MASS}}$   $\times$   $A_{\text{MASS}}$ :  $P = 0.009$ ; KBSM:  $P = 0.007$ ; CLMB:  $P = 0.018$ ; Table S4; Fig. S3).

296 Genetic selection gradients largely supported these results: LMA  $\times$   $N_{\text{MASS}}$  and  $N_{\text{MASS}}$   $\times$   
297  $A_{\text{MASS}}$  interacted to impact biomass among GBLUPs ( $P = 0.080$  and  $P = 0.032$ , respectively;  
298 Table S5; Fig 4). Together, these results demonstrate that correlational selection on particular  
299 leaf economics trait combinations can occur in the field and is genetically based.

300

## 301 Discussion

302 We found evidence that the LES exists in *P. virgatum*, and may be driven by a  
303 combination of genetic architecture and correlational selection. These results provide the  
304 strongest evidence to date for the evolution of the LES within a species. Overall, we found that  
305 correlational selection and genetic architecture generally promote the hypothesized leaf  
306 economics strategies, but that some genetic constraints may limit LES evolution in this system.

307 Few studies have explored the mechanisms driving the evolution of leaf economics  
308 strategies (Donovan et al. 2011). This results, in part, from the fact that most species, and even  
309 many genera, occupy a small portion of the LES (Edwards et al. 2014). Because most species  
310 possess relatively specialized leaf economics strategies, they typically lack sufficient variation  
311 for genetic constraints and correlational selection to promote LES evolution (Agrawal 2020).

312 But, when species exhibit distinct ecotypes or occupy a broad range of habitats, it is possible to  
313 evolve a clear LES at lower taxonomic levels, as we observe in *P. virgatum*. Thus, species like *P.*  
314 *virgatum*, that do possess distinct leaf economic strategies, offer a unique opportunity to evaluate  
315 microevolution of the LES. By crossing genotypes that exhibit divergent leaf economics  
316 strategies, we can break up these leaf economics strategies and examine how selection acts on  
317 combinations of traits that rarely occur naturally. This is especially valuable because it is  
318 impossible to independently manipulate two or more LES traits in a macroevolutionary context  
319 (Shipley et al. 2006).

320 Our approach is not the only valuable way to study the evolution of the LES. One  
321 important method for understanding genetic correlations between traits is artificial selection on  
322 extreme trait combinations. Donovan et al. (2011) advocate for selection on high  $N_{MASS}$  – low  
323  $A_{MASS}$  lines (and vice versa) for multiple generations to determine whether a positive correlation  
324 between  $N_{MASS}$  and  $A_{MASS}$  can be broken up. Another way to evaluate selection on leaf  
325 economics strategies is to grow plants under different resource conditions, then examine how  
326 fitness changes. For instance, to test the hypothesis that acquisitive strategies are favored under  
327 high resource conditions and conservative strategies are favored under low resource conditions,  
328 one could evaluate the fitness of conservative and acquisitive genotypes along an experimental  
329 nutrient gradient. This approach could show not only whether the LES is present within a  
330 species, but also, whether it should evolve through the hypothesized acquisition-conservation  
331 trade-off.

332 The selective pressures acting upon individual species may differ from those that produce  
333 the LES among species, potentially limiting the evolution of the LES within species (Agrawal  
334 2020). For instance, when species specialize in particular habitats or evolve distinct ecotypes

335 adapted to habitats differing in water availability, these selective pressures may not align with  
336 the LES. Thus, LES evolution within species may be rare (Agrawal 2020). In *P. virgatum*, the  
337 evolution of distinct leaf economics strategies may be driven by large differences in growing  
338 season lengths across its range. The northern upland ecotype, which exhibits an acquisitive  
339 strategy (e.g., smaller, narrower leaves with higher  $N_{MASS}$  and  $A_{MASS}$  and lower LMA), may have  
340 evolved to take advantage of the relatively short growing season in the northern US and Canada.  
341 Short growing seasons may promote a quick return-on-investment strategy of low tissue  
342 construction costs and high photosynthetic capacity (Baird et al. 2021). In the southern habitat  
343 typical of the lowland ecotype, the long growing season may select for longer-lived leaves with  
344 higher LMA.

345         Season length as a driver of leaf economics strategies may be particularly important if  
346 divergent selection pressures in the northern and southern portions of *P. virgatum*'s range drive  
347 selection for different leaf economics strategies. All five putative QTL for LMA exhibited  
348 divergence in the same direction—plants with lowland alleles exhibited higher LMA than plants  
349 with upland alleles—suggesting that directional selection may have promoted divergence in  
350 LMA across the range of *P. virgatum* (Milano et al. 2016). Although all significant QTL for  
351 LMA had the same directionality, QTL for  $A_{MASS}$  and  $N_{MASS}$  did not. This suggests that selection  
352 on these two traits may depend on infrequent, severe abiotic or biotic stress, such as cold,  
353 drought, or high consumer pressure (e.g., some strategies may be advantageous only under  
354 severe stress), or stabilizing selection that maintains moderate values of the traits. This may slow  
355 the evolution of leaf economics strategies in *P. virgatum*. Evolution of leaf economics strategies  
356 may also be constrained by the LMA- $A_{MASS}$  relationship: high LMA and high  $A_{MASS}$  were both  
357 favored in selection gradient analysis, but the strong negative genetic correlation between these



358 traits should limit the ability of this combination to evolve. On the other hand, constraints on the  
359 evolution of  $N_{MASS}$ -LMA should be minimal. These traits exhibited a weak negative genetic  
360 correlation and correlational selection in the same direction (i.e., high LMA and low  $N_{MASS}$  are  
361 favored). Together, these results suggest that the conservative strategy should be favored under  
362 most circumstances, but the acquisitive strategy (low LMA, high  $N_{MASS}$ ) could be favored under  
363 more extreme conditions that did not occur over the duration of this study. While it is impractical  
364 to follow these individuals over their entire lifetimes, future studies that incorporate climatic  
365 extremes, either naturally or experimentally, could better determine the conditions that favor the  
366 acquisitive strategy in *P. virgatum*.

367         Our results showed some similarities with the small number of previous studies on this  
368 topic. Like Donovan et al. (2011), we found that genetic correlations between leaf economics  
369 traits were variable and while directional selection occurred on many leaf economics traits in the  
370 studies they surveyed, selection differentials and gradients were not consistent between traits or  
371 across studies. However, due to limitations in the data available to Donovan et al. (2011), there  
372 were also some notable differences between our studies. For instance, we found evidence for  
373 pleiotropic loci controlling both  $N_{MASS}$ - $A_{MASS}$  and  $A_{MASS}$ -LMA and a potential genetic constraint  
374 on the correlated evolution of LMA and  $A_{MASS}$ . Our results are also somewhat consistent with  
375 recent work on the LES in *Arabidopsis thaliana*, which showed that pleiotropic loci control some  
376 leaf economics correlations (Vasseur et al. 2012, Hanemian et al. 2020) and that leaf economics  
377 strategies differ across the geographic range of the species, possibly due to climate-driven  
378 selection (Sartori et al. 2019).

379 *Limitations*

380           This study had several limitations. First, we did not measure leaf economics traits and  
381 fitness on the same plants. This would be important if plasticity in leaf economics traits is high,  
382 particularly if genotypes differ in plasticity (i.e., genotype-by-environment interactions). In a  
383 previous study using different genotypes of *P. virgatum*, we found significant genotype-by-  
384 environment effects on  $N_{\text{MASS}}$ , but not on leaf dry matter content, which is highly correlated with  
385 LMA (Heckman et al. 2020). Given the low heritability of  $A_{\text{MASS}}$ , this trait is likely to exhibit  
386 higher plasticity, although it is unclear whether  $A_{\text{MASS}}$  should exhibit strong GxE. Because  
387 genetic selection gradients were largely consistent with phenotypic selection gradients, plasticity  
388 or environmental correlations in traits should be a minor concern. However, genetic selection  
389 gradients could still be biased by large genotype-by-environment effects. Second, we use  
390 biomass as a proxy for fitness (Franklin and Morrissey 2017). While biomass production is  
391 highly correlated with seed set (Lowry et al. 2019), we cannot assess fitness over the entire  
392 lifespan of this relatively long-lived species. Third, because most ecologically important  
393 quantitative traits are polygenic (Barghi et al. 2020), we probably failed to detect many important  
394 QTL. This is made clear by the fact that significant QTL explained only ~50% of the genetic  
395 variation in these traits. Thus, these QTL results should be considered a hypothesis-generating  
396 tool. Future work could examine in new populations whether the same QTL are detected.  
397 Moreover, future studies could further explore candidate genes in the overlapping QTL regions  
398 that suggest pleiotropy.

### 399 *Conclusions*

400           The worldwide LES is one of the most striking patterns in plant ecology, yet little work  
401 has been done to examine how it evolves. Here, we show that the LES can evolve within a  
402 widespread grass species through a combination of genetically linked traits and correlational

403 selection favoring individuals possessing particular LES combinations. While it is unclear  
404 whether evolution of the LES in *P. virgatum* is driven by the same resource conservation-  
405 acquisition trade-off that is hypothesized to underlie the worldwide LES, this system provides a  
406 rare opportunity to address this longstanding hypothesis in a tractable system.

407

#### 408 **Acknowledgments**

409 We thank Quinn Hiers and Albina Khasanova for help with data collection. Elizabeth Alger,  
410 Tina Arredondo, Nicole Carrabba, Elena Pinaroc, Maya Rao, Maria Villalpando, and Heather  
411 Yang also provided field assistance. Alice MacQueen and other members of the Juenger lab  
412 provided helpful comments on a previous draft of the manuscript. This work was supported by  
413 NSF PGRP IOS 0922457 and IOS 1444533. This research was supported by the Office of  
414 Science (BER), U.S. Department of Energy, Grant no. DE-SC0014156. USDA ARS is an Equal  
415 Opportunity Employer. Mention of trade names or commercial products in this publication does  
416 not imply recommendation or endorsement by the USDA.

417

#### 418 **Author contributions**

419 RWH analyzed the data and led writing with input from TEJ and PAF; TEJ conceived the  
420 experiment; JEB and BEC collected data and contributed to writing.

421

#### 422 **References**

423 Agrawal, A. A. 2020. A scale-dependent framework for trade-offs, syndromes, and  
424 specialization in organismal biology. *Ecology* **101**:e02924.

- 425 Ahrens, C. W., P. D. Rymer, and D. T. Tissue. 2021. Intra-specific trait variation remains hidden  
426 in the environment. *New Phytologist* **229**:1183-1185.
- 427 Anderegg, L. D. L., L. T. Berner, G. Badgley, M. L. Sethi, B. E. Law, J. HilleRisLambers, and J.  
428 Penuelas. 2018. Within-species patterns challenge our understanding of the leaf  
429 economics spectrum. *Ecology Letters* **21**:734-744.
- 430 Anderson, J. T., and T. Mitchell-Olds. 2011. Ecological genetics and genomics of plant defences:  
431 evidence and approaches. *Functional Ecology* **25**:312-324.
- 432 Aspinwall, M. J., D. B. Lowry, S. H. Taylor, T. E. Juenger, C. V. Hawkes, M.-V. V. Johnson, J.  
433 R. Kiniry, and P. A. Fay. 2013. Genotypic variation in traits linked to climate and  
434 aboveground productivity in a widespread C<sub>4</sub> grass: evidence for a functional trait  
435 syndrome. *New Phytologist* **199**:966-980.
- 436 Baird, A. S., et al. 2021. Developmental and biophysical determinants of grass leaf size  
437 worldwide. *Nature* **592**:242-247.
- 438 Barghi, N., J. Hermisson, and C. Schlötterer. 2020. Polygenic adaptation: a unifying framework  
439 to understand positive selection. *Nature Reviews Genetics* **21**:769-781.
- 440 Blonder, B., C. Violle, L. P. Bentley, and B. J. Enquist. 2011. Venation networks and the origin  
441 of the leaf economics spectrum. *Ecology Letters* **14**:91-100.
- 442 Boehm, F. J., E. J. Chesler, B. S. Yandell, and K. W. Broman. 2019. Testing pleiotropy vs.  
443 separate QTL in multiparental populations. *G3 Genes|Genomes|Genetics* **9**:2317-2324.
- 444 Brodie, E. D., A. J. Moore, and F. J. Janzen. 1995. Visualizing and quantifying natural selection.  
445 *Trends in Ecology & Evolution* **10**:313-318.

- 446 Broman, K. W., D. M. Gatti, P. Simecek, N. A. Furlotte, P. Prins, S. Sen, B. S. Yandell, and G.  
447 A. Churchill. 2019. R/qtl2: Software for Mapping Quantitative Trait Loci with High-  
448 Dimensional Data and Multiparent Populations. *Genetics* **211**:495-502.
- 449 Broman, K. W., H. Wu, S. Sen, and G. A. Churchill. 2003. R/qtl: QTL mapping in experimental  
450 crosses. *Bioinformatics* **19**:889-890.
- 451 Caruso, C. M., C. M. Mason, and J. S. Medeiros. 2020. The evolution of functional traits in  
452 plants: is the giant still sleeping? *International Journal of Plant Sciences* **181**:1-8.
- 453 Casler, M. D. 2012. Switchgrass Breeding, Genetics, and Genomics. Pages 29-53 in A. Monti,  
454 editor. *Switchgrass: A Valuable Biomass Crop for Energy*. Springer London, London.
- 455 Conner, J. K., and D. L. Hartl. 2004. *A primer of ecological genetics*. Sinauer Associates  
456 Incorporated.
- 457 Covarrubias-Pazarán, G. 2016. Genome-assisted prediction of quantitative traits using the R  
458 package sommer. *Plos One* **11**:e0156744.
- 459 Díaz, S., et al. 2016. The global spectrum of plant form and function. *Nature* **529**:167-171.
- 460 Donovan, L. A., H. Maherali, C. M. Caruso, H. Huber, and H. de Kroon. 2011. The evolution of  
461 the worldwide leaf economics spectrum. *Trends in Ecology & Evolution* **26**:88-95.
- 462 Edwards, E. J., D. S. Chatelet, L. Sack, and M. J. Donoghue. 2014. Leaf life span and the leaf  
463 economic spectrum in the context of whole plant architecture. *Journal of Ecology*  
464 **102**:328-336.
- 465 Fajardo, A., and A. Siefert. 2018. Intraspecific trait variation and the leaf economics spectrum  
466 across resource gradients and levels of organization. *Ecology* **99**:1024-1030.
- 467 Franklin, O. D., and M. B. Morrissey. 2017. Inference of selection gradients using performance  
468 measures as fitness proxies. *Methods in Ecology and Evolution* **8**:663-677.

- 469 Gromko, M. H. 1995. Unpredictability of correlated response to selection: pleiotropy and  
470 sampling interact. *Evolution* **49**:685-693.
- 471 Guilherme Pereira, C., and D. L. Des Marais. 2020. The genetic basis of plant functional traits  
472 and the evolution of plant-environment interactions. *International Journal of Plant  
473 Sciences* **181**:56-74.
- 474 Hanemian, M., F. Vasseur, E. Marchadier, E. Gilbault, J. Bresson, I. Gy, C. Violle, and O.  
475 Loudet. 2020. Natural variation at FLM splicing has pleiotropic effects modulating  
476 ecological strategies in *Arabidopsis thaliana*. *Nature Communications* **11**:4140.
- 477 Heberling, J. M., and J. D. Fridley. 2012. Biogeographic constraints on the world-wide leaf  
478 economics spectrum. *Global Ecology and Biogeography* **21**:1137-1146.
- 479 Heckman, R. W., A. R. Khasanova, N. S. Johnson, S. Weber, J. E. Bonnette, M. J. Aspinwall, L.  
480 G. Reichmann, T. E. Juenger, P. A. Fay, and C. V. Hawkes. 2020. Plant biomass, not  
481 plant economics traits, determines responses of soil CO<sub>2</sub> efflux to precipitation in the C<sub>4</sub>  
482 grass *Panicum virgatum*. *Journal of Ecology* **108**:2095-2106.
- 483 Hill, W. G. 2013. On estimation of genetic variance within families using genome-wide identity-  
484 by-descent sharing. *Genetics Selection Evolution* **45**:32.
- 485 Ji, W., S. E. LaZerte, M. J. Waterway, and M. J. Lechowicz. 2020. Functional ecology of  
486 congeneric variation in the leaf economics spectrum. *New Phytologist* **225**:196-208.
- 487 John, G. P., C. Scoffoni, T. N. Buckley, R. Villar, H. Poorter, and L. Sack. 2017. The anatomical  
488 and compositional basis of leaf mass per area. *Ecology Letters* **20**:412-425.
- 489 Lande, R., and S. J. Arnold. 1983. The measurement of selection on correlated characters.  
490 *Evolution*:1210-1226.

- 491 Lovell, J., A. Healey, J. Schmutz, and T. Juenger. 2020. Switchgrass v5 4-way (AP13 x DAC,  
492 WBC x VS16) genetic map. Dryad.
- 493 Lovell, J. T., et al. 2021. Genomic mechanisms of climate adaptation in polyploid bioenergy  
494 switchgrass. *Nature* **590**:438-444.
- 495 Lowry, D. B., K. D. Behrman, P. Grabowski, G. P. Morris, J. R. Kiniry, and T. E. Juenger. 2014.  
496 Adaptations between ecotypes and along environmental gradients in *Panicum virgatum*.  
497 *American Naturalist* **183**:682-692.
- 498 Lowry, D. B., et al. 2019. QTL  $\times$  environment interactions underlie adaptive divergence in  
499 switchgrass across a large latitudinal gradient. *Proceedings of the National Academy of*  
500 *Sciences* **116**:12933.
- 501 Lynch, M., and B. Walsh. 1998. Genetics and analysis of quantitative traits.
- 502 Mackay, T. F. C. 2001. The genetic architecture of quantitative traits. *Annual Review of*  
503 *Genetics* **35**:303-339.
- 504 Mason, C. M., E. W. Goolsby, D. P. Humphreys, and L. A. Donovan. 2016. Phylogenetic  
505 structural equation modelling reveals no need for an ‘origin’ of the leaf economics  
506 spectrum. *Ecology Letters* **19**:54-61.
- 507 Mauricio, R. 2001. Mapping quantitative trait loci in plants: uses and caveats for evolutionary  
508 biology. *Nature Reviews Genetics* **2**:370-381.
- 509 Messier, J., B. J. McGill, B. J. Enquist, and M. J. Lechowicz. 2017. Trait variation and  
510 integration across scales: is the leaf economic spectrum present at local scales?  
511 *Ecography* **40**:685-697.

- 512 Milano, E. R., D. B. Lowry, and T. E. Juenger. 2016. The genetic basis of upland/lowland  
513 ecotype divergence in switchgrass (*Panicum virgatum*). *G3 Genes|Genomes|Genetics*  
514 **6**:3561-3570.
- 515 Onoda, Y., I. J. Wright, J. R. Evans, K. Hikosaka, K. Kitajima, Ü. Niinemets, H. Poorter, T.  
516 Tosens, and M. Westoby. 2017. Physiological and structural tradeoffs underlying the leaf  
517 economics spectrum. *New Phytologist* **214**:1447-1463.
- 518 Palik, D. J., A. A. Snow, A. L. Stottlemeyer, M. N. Miriti, and E. A. Heaton. 2016. Relative  
519 performance of non-local cultivars and local, wild populations of Switchgrass (*Panicum*  
520 *virgatum*) in competition experiments. *Plos One* **11**:e0154444.
- 521 Pinheiro, J., D. Bates, S. DebRoy, and D. Sarkar. 2016. nlme: linear and nonlinear mixed effects  
522 models. R package version 3.1–127.
- 523 Rausher, M. D. 1992. The measurement of selection on quantitative traits: biases due to  
524 environmental covariances between traits and fitness. *Evolution* **46**:616-626.
- 525 Reich, P. B. 2014. The world-wide ‘fast–slow’ plant economics spectrum: a traits manifesto.  
526 *Journal of Ecology* **102**:275-301.
- 527 Sartori, K., et al. 2019. Leaf economics and slow-fast adaptation across the geographic range of  
528 *Arabidopsis thaliana*. *Scientific Reports* **9**:10758.
- 529 Sherrard, M. E., and H. Maherali. 2006. The adaptive significance of drought escape in *Avena*  
530 *barbata*, an annual grass. *Evolution* **60**:2478.
- 531 Shipley, B., M. J. Lechowicz, I. Wright, and P. B. Reich. 2006. Fundamental trade-offs  
532 generating the worldwide leaf economics spectrum. *Ecology* **87**:535-541.
- 533 Siefert, A., et al. 2015. A global meta-analysis of the relative extent of intraspecific trait variation  
534 in plant communities. *Ecology Letters* **18**:1406-1419.



- 535 Sinervo, B., and E. Svensson. 2002. Correlational selection and the evolution of genomic  
536 architecture. *Heredity* **89**:329-338.
- 537 Stinchcombe, J. R., A. F. Agrawal, P. A. Hohenlohe, S. J. Arnold, and M. W. Blows. 2008.  
538 Estimating nonlinear selection gradients using quadratic regression coefficients: double  
539 or nothing? *Evolution* **62**:2435-2440.
- 540 Svensson, E. I., et al. 2021. Correlational selection in the age of genomics. *Nature Ecology &*  
541 *Evolution* **5**:562-573.
- 542 Swenson, N. G., S. J. Worthy, D. Eubanks, Y. Iida, L. Monks, K. Petprakob, V. E. Rubio, K.  
543 Staiger, and J. Zambrano. 2020. A reframing of trait–demographic rate analyses for  
544 ecology and evolutionary biology. *International Journal of Plant Sciences* **181**:33-43.
- 545 Vasseur, F., C. Violle, B. J. Enquist, C. Granier, and D. Vile. 2012. A common genetic basis to  
546 the origin of the leaf economics spectrum and metabolic scaling allometry. *Ecology*  
547 *Letters* **15**:1149-1157.
- 548 Walsh, B., and M. W. Blows. 2009. Abundant genetic variation + strong selection = multivariate  
549 genetic constraints: a geometric view of adaptation. *Annual Review of Ecology,*  
550 *Evolution, and Systematics* **40**:41-59.
- 551 Warton, D. I., R. A. Duursma, D. S. Falster, and S. Taskinen. 2012. smatr 3– an R package for  
552 estimation and inference about allometric lines. *Methods in Ecology and Evolution*  
553 **3**:257-259.
- 554 Warton, D. I., I. J. Wright, D. S. Falster, and M. Westoby. 2006. Bivariate line-fitting methods  
555 for allometry. *Biological Reviews* **81**:259-291.
- 556 Wright, I. J., et al. 2004. The worldwide leaf economics spectrum. *Nature* **428**:821-827.
- 557

**Table 1** Genetic basis of three leaf economics traits.  $H^2$  is broad-sense heritability [ $V_G / (V_G + V_e)$ ]  $\pm$  standard error; variance explained by QTL is calculated from a multiple-QTL model using all identified putative QTL as predictors of each trait; proportion of heritable variation explained by QTL is the ratio of variance explained by QTL to  $H^2$ . LMA is leaf mass per area ( $\text{g m}^{-2}$ );  $N_{\text{MASS}}$  is mass-based leaf nitrogen content (%);  $A_{\text{MASS}}$  is mass-based leaf photosynthetic rate ( $\mu\text{mol C g}^{-1} \text{s}^{-1}$ ).

|                   | $H^2$           | Variance explained<br>by QTL | Proportion of heritable<br>variation explained by QTL |
|-------------------|-----------------|------------------------------|-------------------------------------------------------|
| LMA               | $0.51 \pm 0.07$ | 0.33                         | 0.65                                                  |
| $N_{\text{MASS}}$ | $0.46 \pm 0.08$ | 0.24                         | 0.52                                                  |
| $A_{\text{MASS}}$ | $0.26 \pm 0.08$ | 0.19                         | 0.73                                                  |

**Table 2** Significant QTL markers for each leaf economics trait detected at a LOD threshold of  $\alpha = 0.15$ . P values are based on F tests calculated by dropping one QTL at a time from a multiple-QTL model that included all putative QTL for each trait.

| Trait             | Marker          | LOD    | P       |
|-------------------|-----------------|--------|---------|
| LMA               | Chr2N@56.080999 | 3.972  | < 0.001 |
|                   | Chr5N@4.933063  | 7.814  | < 0.001 |
|                   | Chr8N@13.652308 | 3.873  | < 0.001 |
|                   | Chr9K@12.433663 | 10.359 | < 0.001 |
|                   | Chr9N@79.37425  | 4.173  | < 0.001 |
| A <sub>MASS</sub> | Chr2K@11.849289 | 6.079  | < 0.001 |
|                   | Chr2K@59.819311 | 4.58   | 0.017   |
|                   | Chr8K@11.338989 | 4.771  | < 0.001 |
|                   | Chr9K@13.273228 | 3.896  | 0.002   |
| N <sub>MASS</sub> | Chr2K@10.283923 | 4.164  | < 0.001 |
|                   | Chr2K@61.75027  | 5.601  | < 0.001 |
|                   | Chr3N@16.536961 | 8.592  | < 0.001 |
|                   | Chr5K@21.5219   | 3.929  | < 0.001 |

**Table 3** Genetic correlations between leaf economics traits. LMA is leaf mass per area ( $\text{g m}^{-2}$ );  $N_{\text{MASS}}$  is mass-based leaf nitrogen content (%);  $A_{\text{MASS}}$  is mass-based leaf photosynthetic rate ( $\mu\text{mol C g}^{-1} \text{s}^{-1}$ ).

|                   | LMA                 | $A_{\text{MASS}}$ | $N_{\text{MASS}}$ |
|-------------------|---------------------|-------------------|-------------------|
| LMA               | ---                 |                   |                   |
| $A_{\text{MASS}}$ | <b>-0.76</b> (0.12) | ---               |                   |
| $N_{\text{MASS}}$ | -0.16 (0.17)        | 0.26 (0.21)       | ---               |

558 **Figure legends**

559 **Fig 1** Relationship between **A**) leaf mass-based nitrogen ( $N_{\text{MASS}}$ ; %) and leaf mass per area  
560 (LMA;  $\text{g m}^{-2}$ ); **B**) leaf mass-based photosynthetic rate ( $A_{\text{MASS}}$ ;  $\mu\text{mol C g}^{-1} \text{s}^{-1}$ ) and LMA; **C**)  
561  $A_{\text{MASS}}$  and  $N_{\text{MASS}}$  calculated using standardized major axis regression. Black dots are *P. virgatum*  
562  $F_2$  individuals; blue triangles are  $F_0$  line means (not included in SMA line fit). Inset plots show  
563 the location of *P. virgatum*  $F_2$  individuals (black dots) relative to the worldwide leaf economics  
564 spectrum (grey dots; from Wright et al. 2004) on a  $\log_{10}$ - $\log_{10}$  scale.

565 **Fig 2 A** Location of QTL for three leaf economics traits, LMA,  $N_{\text{MASS}}$ , and  $A_{\text{MASS}}$ . Point  
566 estimates are the location of highest LOD score and confidence intervals are the region within a  
567 1.5 LOD drop. **B** Effects of genotype on leaf economics traits at three colocated QTL markers  
568 (i.e., markers with overlapping confidence intervals) calculated using ordinary least squares  
569 regression. Genotypes at each QTL are a consequence of recombination in the experimental  
570 cross, resulting in four possible combinations of alleles. In each panel, lowland1 and lowland2  
571 denote alleles inherited from genotypes AP13 and WBC, respectively; upland1 and upland2  
572 denote alleles inherited from genotypes DAC and VS16, respectively. Error bars represent 95%  
573 confidence intervals; shared letters indicate no significant difference between genotypes. For all  
574 colocated QTL pairs, genotype effects are in a consistent direction (i.e., each genotype  
575 exhibits conservative or acquisitive values of both traits) and are consistent with pleiotropy. See  
576 Fig. 1 legend for units and abbreviations.

577 **Fig 3 A** Effects of standardized LMA and  $N_{\text{MASS}}$  (transformed such that across all plants, mean =  
578 0 and sd = 1) on relative biomass while controlling for  $A_{\text{MASS}}$ . Following (Stinchcombe et al.

579 2008), model-derived quadratic parameter estimates are doubled. **B** Selection gradients estimated  
580 at each site. Linear selection gradients ( $\beta_i$ ) are main effects; non-linear selection gradients ( $\gamma_{ii}$ )  
581 are quadratic effects (model-derived estimates were doubled); non-linear correlational selection  
582 gradients ( $\gamma_{ij}$ ) are interactive effects between two leaf economics traits. Red points denote  
583 significant effect. See Fig. 1 legend for units and abbreviations.

584 **Fig 4 A** Effects of LMA and  $N_{MASS}$  genomic linear unbiased predictors (GBLUPs) on plant  
585 biomass GBLUPs **B** Effects of  $N_{MASS}$  and  $A_{MASS}$  GBLUPs on plant biomass GBLUPs. GBLUPs  
586 were calculated separately for each trait from a mixed model that accounted for the relatedness  
587 among individuals by incorporating an additive genetic relatedness matrix

588

**Fig 1**

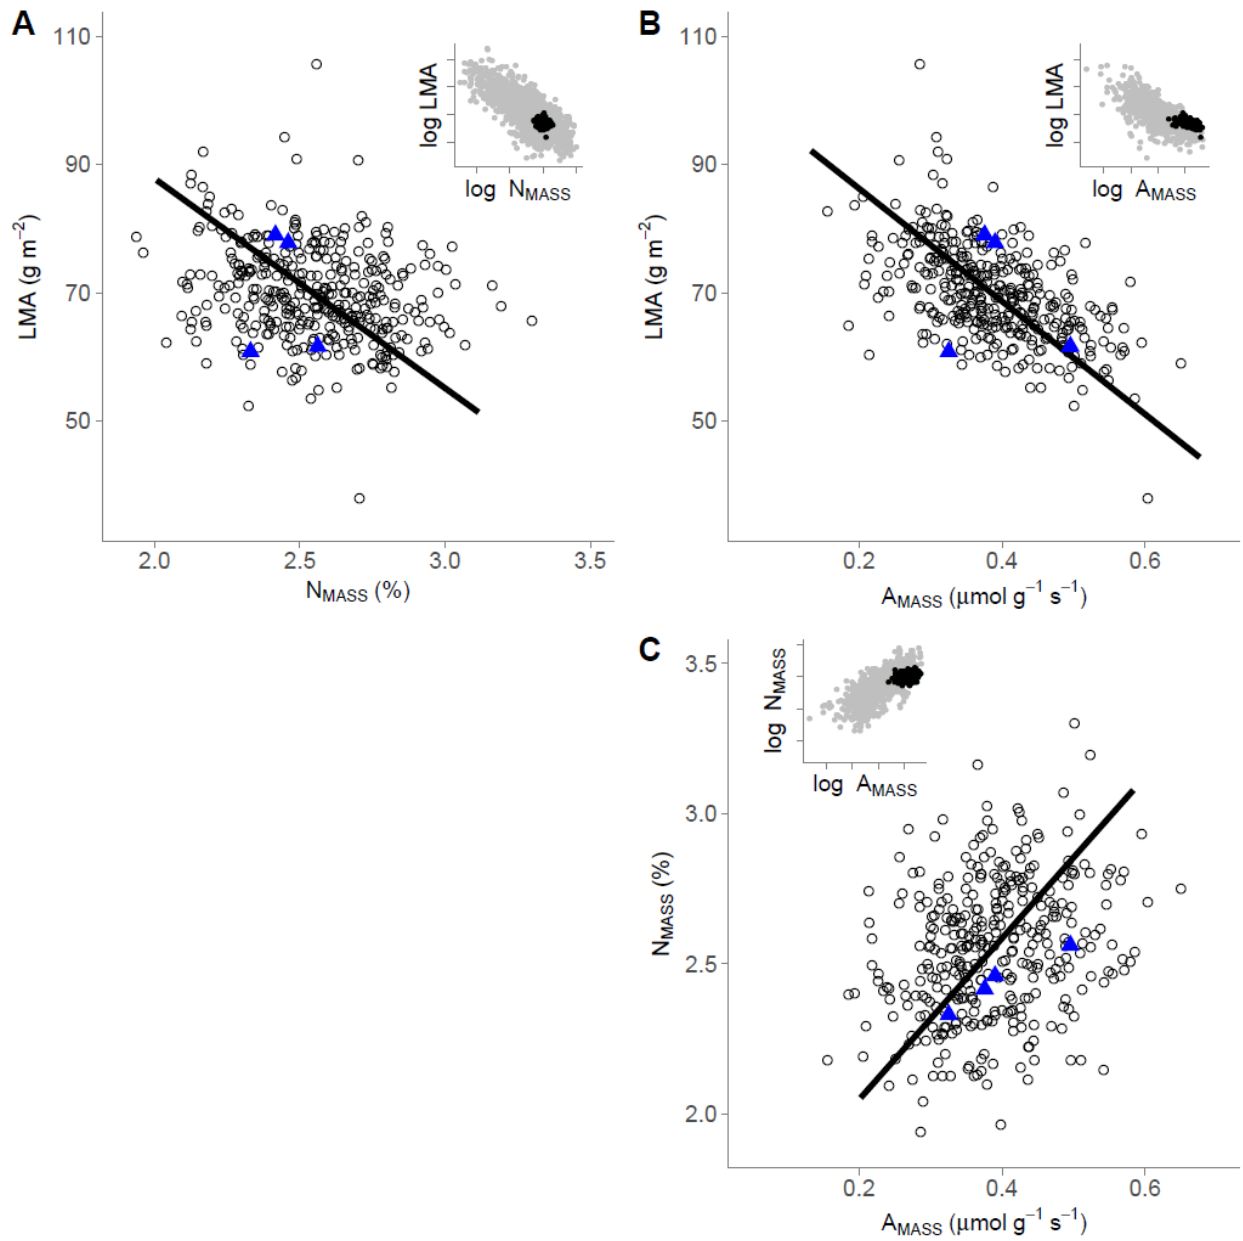

**Fig 2**

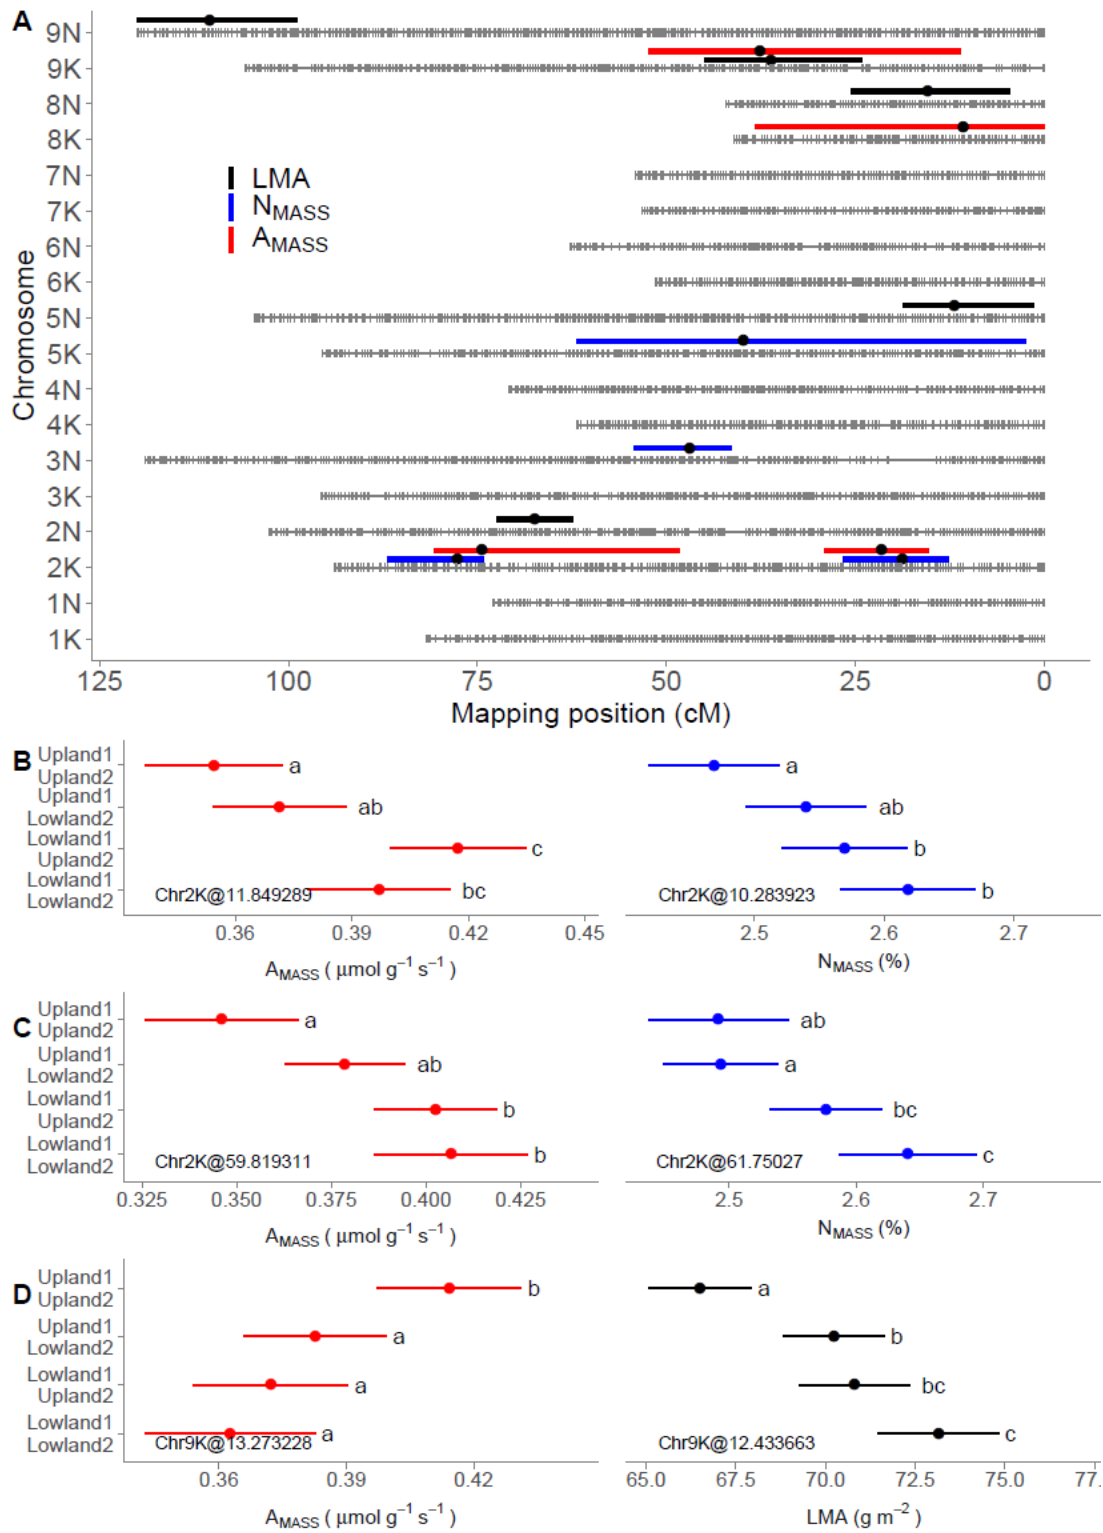



**Fig 3**

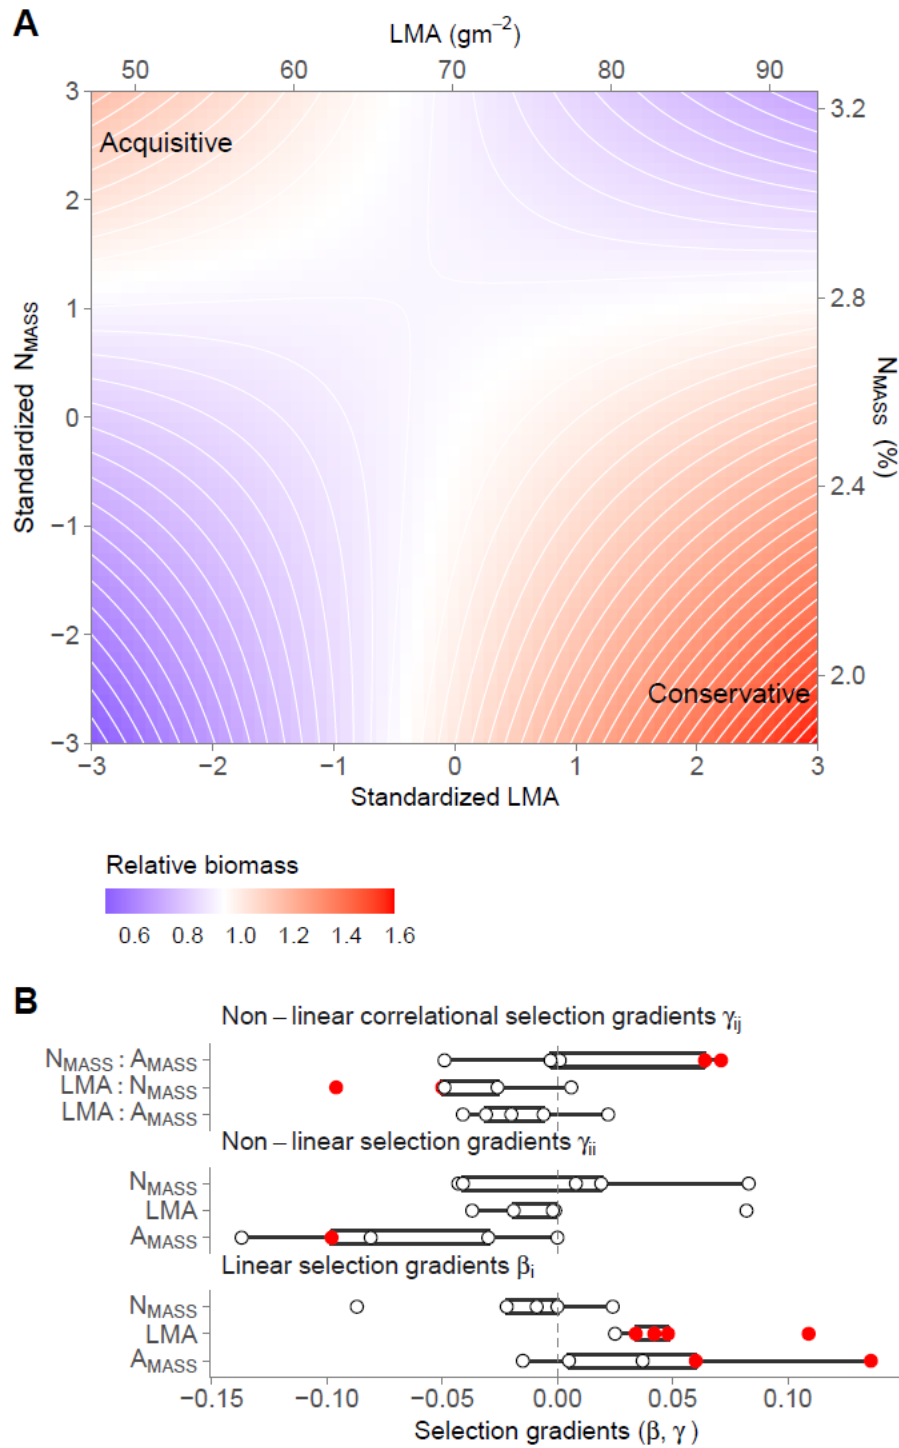

**Fig 4**

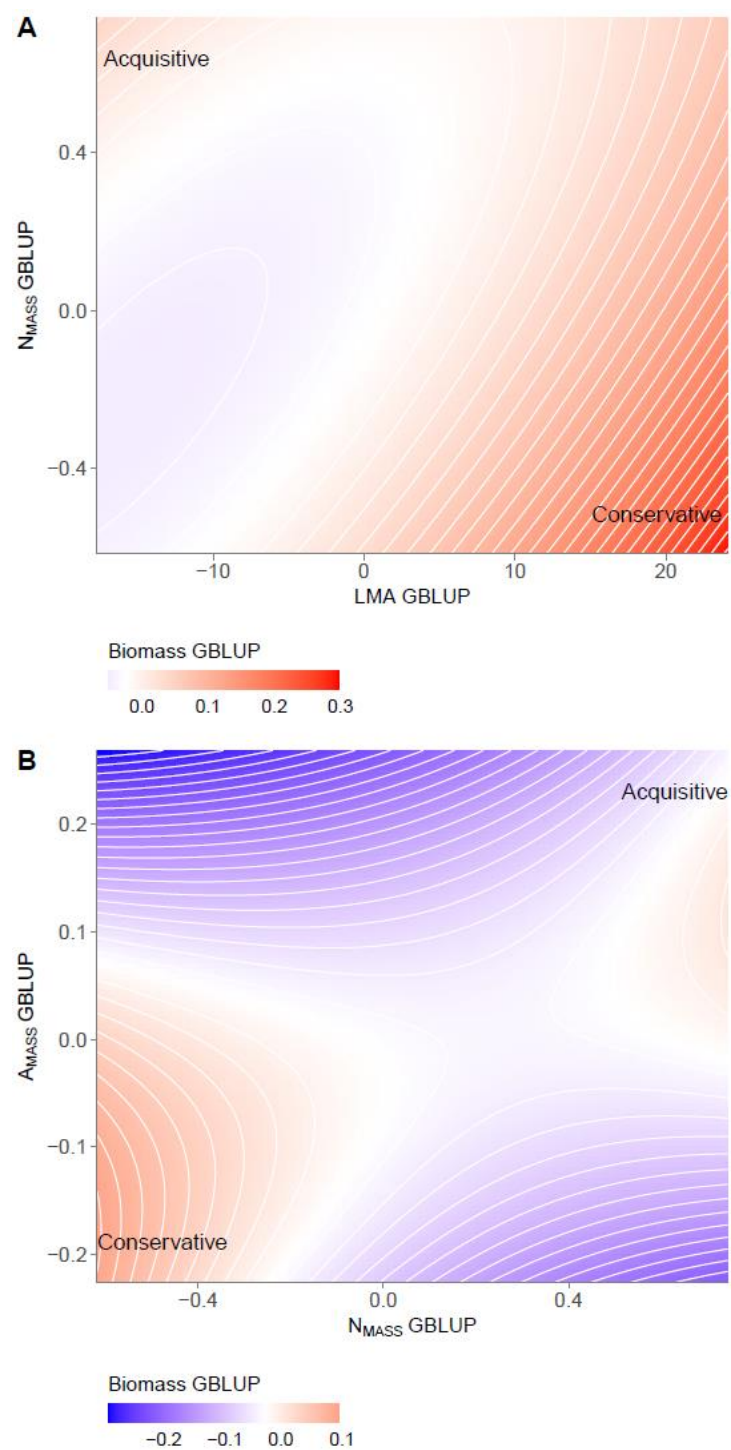

Source: https://biorxiv.org/content/10.1101/2021.11.14.468541v1.full.pdf
